# Supplementary material for: SNP Association Mapping across the Extended Major Histocompatibility Complex and Risk of B-Cell Precursor Acute Lymphoblastic Leukemia in Children
Source: PubMed Central journal article supplement (PMC3749982; doi:10.1371/journal.pone.0072557), 2013-08-22

**Extended Class I  
rs7747023 (A>G)**

|                                 | Ca  | Co  | OR   | 95%CI     |
|---------------------------------|-----|-----|------|-----------|
| <b>B-cell ALL: log-additive</b> | 567 | 892 | 0.73 | 0.60-0.89 |
| <b>Genetic Models</b>           |     |     |      |           |
| G/A (vs A/A)                    | 145 | 285 | 0.70 | 0.56-0.87 |
| G/G (vs A/A)                    | 19  | 42  | 0.60 | 0.35-1.03 |
| Dominant                        | 164 | 327 | 0.69 | 0.55-0.87 |
| Recessive                       | 19  | 42  | 0.67 | 0.39-1.15 |

**By Race/Ethnicity (P homogeneity=0.106)**

|                    |     |     |      |           |
|--------------------|-----|-----|------|-----------|
| Non-Hispanic white | 241 | 426 | 0.59 | 0.42-0.83 |
| Hispanic           | 326 | 466 | 0.83 | 0.65-1.06 |

**By Sex (P homogeneity=0.735)**

|        |     |     |      |           |
|--------|-----|-----|------|-----------|
| Male   | 298 | 495 | 0.71 | 0.54-0.93 |
| Female | 269 | 397 | 0.76 | 0.57-1.01 |

**By Age (P homogeneity=0.547)**

|              |     |     |      |           |
|--------------|-----|-----|------|-----------|
| 0 - 5 years  | 391 | 571 | 0.75 | 0.60-0.94 |
| 6 - 14 years | 176 | 321 | 0.66 | 0.47-0.93 |

**Major B-cell ALL subtypes**

|                             |     |     |      |           |
|-----------------------------|-----|-----|------|-----------|
| cALL (CD10+/CD19+, 2-5 yrs) | 309 | 892 | 0.77 | 0.60-0.99 |
| Non-cALL                    | 258 | 892 | 0.71 | 0.54-0.93 |
| Hyperdiploid                | 178 | 892 | 0.70 | 0.52-0.94 |
| TEL-AML1                    | 96  | 892 | 0.82 | 0.56-1.20 |
| Normal karyotype            | 58  | 892 | 0.65 | 0.39-1.08 |

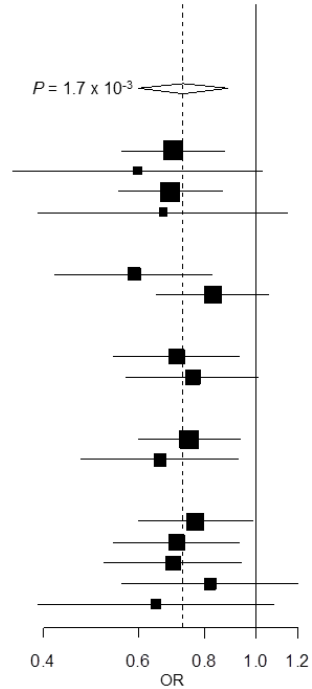

**MHC Class I  
rs3130785 (G>A)**

|                                 | Ca  | Co  | OR   | 95%CI     |
|---------------------------------|-----|-----|------|-----------|
| <b>B-cell ALL: log-additive</b> | 567 | 892 | 1.45 | 1.16-1.81 |
| <b>Genetic Models</b>           |     |     |      |           |
| A/G (vs G/G)                    | 147 | 181 | 1.46 | 1.13-1.89 |
| A/A (vs G/G)                    | 11  | 10  | 2.06 | 0.86-4.93 |
| Dominant                        | 158 | 191 | 1.49 | 1.16-1.91 |
| Recessive                       | 11  | 10  | 1.87 | 0.78-4.48 |

**By Race/Ethnicity (P homogeneity=0.194)**

|                    |     |     |      |           |
|--------------------|-----|-----|------|-----------|
| Non-Hispanic white | 241 | 426 | 1.27 | 0.93-1.73 |
| Hispanic           | 326 | 466 | 1.72 | 1.23-2.41 |

**By Sex (P homogeneity=0.596)**

|        |     |     |      |           |
|--------|-----|-----|------|-----------|
| Male   | 298 | 495 | 1.38 | 1.01-1.89 |
| Female | 269 | 397 | 1.56 | 1.12-2.17 |

**By Age (P homogeneity=0.608)**

|              |     |     |      |           |
|--------------|-----|-----|------|-----------|
| 0 - 5 years  | 391 | 571 | 1.39 | 1.04-1.86 |
| 6 - 14 years | 176 | 321 | 1.57 | 1.09-2.26 |

**Major B-cell ALL subtypes**

|                             |     |     |      |           |
|-----------------------------|-----|-----|------|-----------|
| cALL (CD10+/CD19+, 2-5 yrs) | 309 | 892 | 1.46 | 1.09-1.96 |
| Non-cALL                    | 258 | 892 | 1.40 | 1.05-1.87 |
| Hyperdiploid                | 178 | 892 | 1.46 | 1.05-2.03 |
| TEL-AML1                    | 96  | 892 | 1.47 | 0.94-2.30 |
| Normal karyotype            | 58  | 892 | 1.80 | 1.07-3.03 |

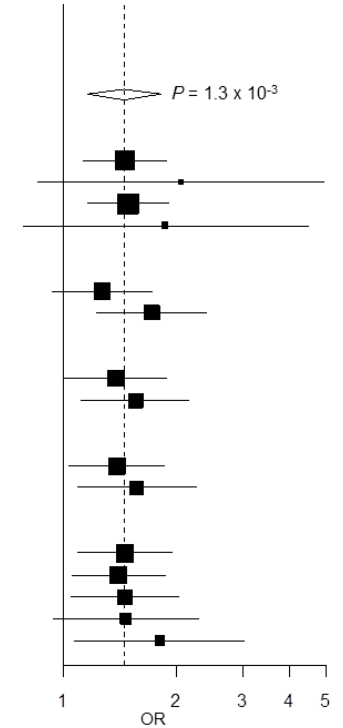

| MHC Class I<br>rs1632856 (G>A)                 |     |     |      |           |
|------------------------------------------------|-----|-----|------|-----------|
|                                                | Ca  | Co  | OR   | 95%CI     |
| <b>B-cell ALL: log-additive</b>                |     |     |      |           |
|                                                | 567 | 892 | 0.80 | 0.68-0.94 |
| <b>Genetic Models</b>                          |     |     |      |           |
| A/G (vs G/G)                                   | 213 | 363 | 0.82 | 0.66-1.02 |
| A/A (vs G/G)                                   | 35  | 80  | 0.62 | 0.40-0.96 |
| Dominant                                       | 248 | 443 | 0.78 | 0.63-0.97 |
| Recessive                                      | 35  | 80  | 0.67 | 0.44-1.02 |
| <b>By Race/Ethnicity (P homogeneity=0.611)</b> |     |     |      |           |
| Non-Hispanic white                             | 241 | 426 | 0.84 | 0.66-1.07 |
| Hispanic                                       | 326 | 466 | 0.77 | 0.61-0.97 |
| <b>By Sex (P homogeneity=0.349)</b>            |     |     |      |           |
| Male                                           | 298 | 495 | 0.74 | 0.58-0.94 |
| Female                                         | 269 | 397 | 0.87 | 0.69-1.10 |
| <b>By Age (P homogeneity=0.947)</b>            |     |     |      |           |
| 0 - 5 years                                    | 391 | 571 | 0.80 | 0.65-0.98 |
| 6 - 14 years                                   | 176 | 321 | 0.79 | 0.58-1.08 |
| <b>Major B-cell ALL subtypes</b>               |     |     |      |           |
| cALL (CD10+/CD19+, 2-5 yrs)                    | 309 | 892 | 0.82 | 0.66-1.02 |
| Non-cALL                                       | 258 | 892 | 0.77 | 0.61-0.97 |
| Hyperdiploid                                   | 178 | 892 | 0.74 | 0.57-0.96 |
| TEL-AML1                                       | 96  | 892 | 0.75 | 0.53-1.06 |
| Normal karyotype                               | 58  | 892 | 0.66 | 0.42-1.04 |

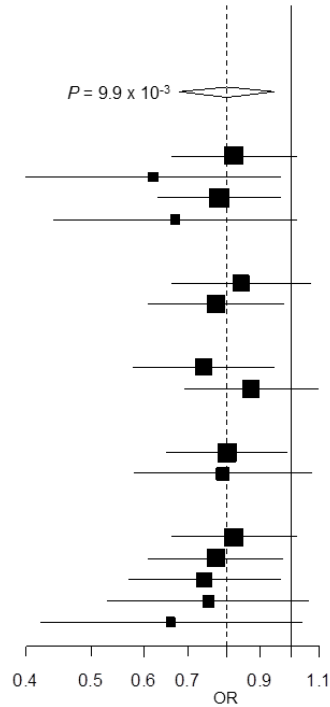

| MHC Class I<br>rs2524279 (A>G)                 |     |     |      |           |
|------------------------------------------------|-----|-----|------|-----------|
|                                                | Ca  | Co  | OR   | 95%CI     |
| <b>B-cell ALL: log-additive</b>                |     |     |      |           |
|                                                | 565 | 888 | 0.73 | 0.58-0.92 |
| <b>Genetic Models</b>                          |     |     |      |           |
| G/A (vs A/A)                                   | 120 | 227 | 0.76 | 0.59-0.98 |
| G/G (vs A/A)                                   | 4   | 16  | 0.36 | 0.12-1.08 |
| Dominant                                       | 124 | 243 | 0.74 | 0.57-0.96 |
| Recessive                                      | 4   | 16  | 0.34 | 0.13-0.89 |
| <b>By Race/Ethnicity (P homogeneity=0.567)</b> |     |     |      |           |
| Non-Hispanic white                             | 240 | 424 | 0.67 | 0.46-0.98 |
| Hispanic                                       | 325 | 464 | 0.77 | 0.57-1.04 |
| <b>By Sex (P homogeneity=0.686)</b>            |     |     |      |           |
| Male                                           | 296 | 493 | 0.70 | 0.51-0.96 |
| Female                                         | 269 | 395 | 0.77 | 0.55-1.08 |
| <b>By Age (P homogeneity=0.699)</b>            |     |     |      |           |
| 0 - 5 years                                    | 389 | 569 | 0.70 | 0.53-0.92 |
| 6 - 14 years                                   | 176 | 319 | 0.77 | 0.52-1.14 |
| <b>Major B-cell ALL subtypes</b>               |     |     |      |           |
| cALL (CD10+/CD19+, 2-5 yrs)                    | 308 | 888 | 0.77 | 0.57-1.04 |
| Non-cALL                                       | 257 | 888 | 0.68 | 0.50-0.92 |
| Hyperdiploid                                   | 178 | 888 | 0.66 | 0.45-0.97 |
| TEL-AML1                                       | 95  | 888 | 0.58 | 0.34-0.99 |
| Normal karyotype                               | 58  | 888 | 0.99 | 0.58-1.69 |

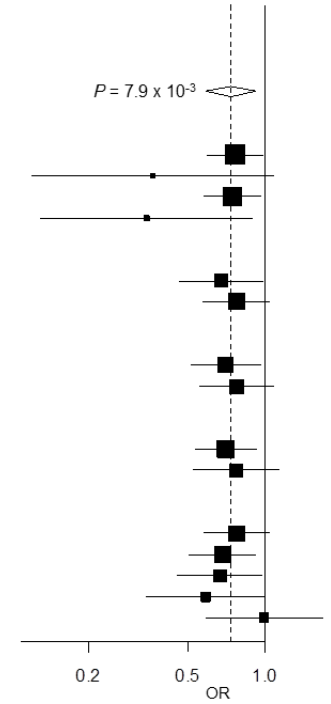

**Extended Class II  
rs213203 (C>A)**

|  | Ca | Co | OR | 95%CI |
|--|----|----|----|-------|
|--|----|----|----|-------|

|                                        |     |     |      |           |
|----------------------------------------|-----|-----|------|-----------|
| <b>B-cell ALL: A/C (vs C/C or A/A)</b> | 247 | 471 | 0.68 | 0.55-0.84 |
|----------------------------------------|-----|-----|------|-----------|

**Genetic Models**

|              |     |     |      |           |
|--------------|-----|-----|------|-----------|
| A/C (vs C/C) | 247 | 471 | 0.62 | 0.48-0.80 |
| A/A (vs C/C) | 146 | 210 | 0.83 | 0.62-1.11 |
| Log-additive | 567 | 892 | 0.90 | 0.78-1.04 |
| Dominant     | 393 | 681 | 0.68 | 0.54-0.86 |
| Recessive    | 146 | 210 | 1.12 | 0.88-1.43 |

**By Race/Ethnicity (P homogeneity=1.000)**

|                    |     |     |      |           |
|--------------------|-----|-----|------|-----------|
| Non-Hispanic white | 241 | 426 | 0.68 | 0.49-0.94 |
| Hispanic           | 326 | 466 | 0.68 | 0.51-0.91 |

**By Sex (P homogeneity=0.789)**

|        |     |     |      |           |
|--------|-----|-----|------|-----------|
| Male   | 298 | 495 | 0.66 | 0.49-0.89 |
| Female | 269 | 397 | 0.70 | 0.51-0.96 |

**By Age (P homogeneity=0.655)**

|              |     |     |      |           |
|--------------|-----|-----|------|-----------|
| 0 - 5 years  | 391 | 571 | 0.65 | 0.50-0.84 |
| 6 - 14 years | 176 | 321 | 0.72 | 0.50-1.04 |

**Major B-cell ALL subtypes**

|                             |     |     |      |           |
|-----------------------------|-----|-----|------|-----------|
| cALL (CD10+/CD19+, 2-5 yrs) | 309 | 892 | 0.69 | 0.53-0.90 |
| Non-cALL                    | 258 | 892 | 0.64 | 0.48-0.85 |
| Hyperdiploid                | 178 | 892 | 0.67 | 0.48-0.94 |
| TEL-AML1                    | 96  | 892 | 0.76 | 0.50-1.16 |
| Normal karyotype            | 58  | 892 | 0.40 | 0.22-0.73 |

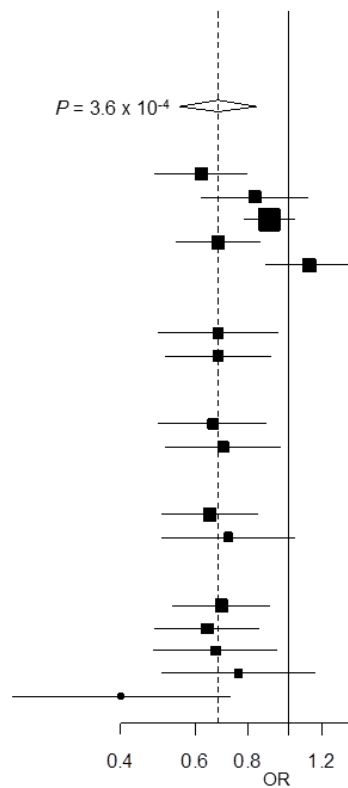

Supplement: pone.0072557.s003.pdf [file pone.0072557.s003.pdf]
