# Supplementary material for: SNP Association Mapping across the Extended Major Histocompatibility Complex and Risk of B-Cell Precursor Acute Lymphoblastic Leukemia in Children
Source: PubMed Central journal article supplement (PMC3749982; doi:10.1371/journal.pone.0072557), 2013-08-22
Supplement: pone.0072557.s004.pdf [file pone.0072557.s004.pdf]

**Table S1.** Evaluation of the independent effects in the multivariable analysis of 20 xMHC SNPs potentially associated with childhood BCP-ALL (p-value < 0.01 in the singles SNP analysis).

| SNP                    | Position | Minor allele | Test <sup>a</sup> | Model                    |                      |                              |                      |                              |                      |                              |                      |
|------------------------|----------|--------------|-------------------|--------------------------|----------------------|------------------------------|----------------------|------------------------------|----------------------|------------------------------|----------------------|
|                        |          |              |                   | SNP + covariates         |                      | SNP + rs7747023 + covariates |                      | SNP + rs3130785 + covariates |                      | SNP + rs9296068 + covariates |                      |
|                        |          |              |                   | OR (95% CI) <sup>b</sup> | p-value              | OR (95% CI) <sup>b</sup>     | p-value              | OR (95% CI) <sup>b</sup>     | p-value              | OR (95% CI) <sup>b</sup>     | p-value              |
| <b>Region A</b>        |          |              |                   |                          |                      |                              |                      |                              |                      |                              |                      |
| rs3118361              | 29006266 | A            | dom               | 1.45 (1.11-1.89)         | 6.4x10 <sup>-3</sup> | 1.42 (1.09-1.85)             | 0.010                | 1.50 (1.14-1.95)             | 3.2x10 <sup>-3</sup> | 1.34 (1.03-1.76)             | 0.032                |
| rs2032502              | 29009544 | A            | dom               | 0.70 (0.53-0.91)         | 7.5x10 <sup>-3</sup> | 0.88 (0.61-1.28)             | 0.513                | 0.70 (0.53-0.91)             | 8.1x10 <sup>-3</sup> | 0.70 (0.53-0.91)             | 7.6x10 <sup>-3</sup> |
| rs4947256              | 29029919 | A            | add               | 0.72 (0.57-0.91)         | 6.7x10 <sup>-3</sup> | 0.90 (0.63-1.27)             | 0.532                | 0.72 (0.57-0.92)             | 8.1x10 <sup>-3</sup> | 0.72 (0.56-0.91)             | 6.4x10 <sup>-3</sup> |
| rs7747023 <sup>c</sup> | 29133659 | G            | add               | 0.73 (0.60-0.89)         | 1.7x10 <sup>-3</sup> | NA                           | NA                   | 0.73 (0.60-0.89)             | 1.6x10 <sup>-3</sup> | 0.73 (0.60-0.88)             | 1.4x10 <sup>-3</sup> |
| rs9348821              | 29155182 | G            | add               | 0.74 (0.61-0.89)         | 1.9x10 <sup>-3</sup> | 1.03 (0.14-7.79)             | 0.977                | 0.73 (0.60-0.89)             | 1.7x10 <sup>-3</sup> | 0.73 (0.60-0.89)             | 1.6x10 <sup>-3</sup> |
| rs1883329              | 29285081 | A            | dom               | 1.34 (1.09-1.66)         | 6.7x10 <sup>-3</sup> | 1.24 (0.99-1.54)             | 0.060                | 1.34 (1.08-1.65)             | 7.7x10 <sup>-3</sup> | 1.33 (1.08-1.65)             | 8.6x10 <sup>-3</sup> |
| <b>Region B</b>        |          |              |                   |                          |                      |                              |                      |                              |                      |                              |                      |
| rs17281677             | 30730438 | A            | add               | 1.76 (1.15-2.70)         | 9.0x10 <sup>-3</sup> | 1.71 (1.12-2.63)             | 0.013                | 1.39 (0.87-2.22)             | 0.173                | 1.82 (1.19-2.80)             | 6.1x10 <sup>-3</sup> |
| rs3130666              | 30848139 | A            | add               | 1.80 (1.22-2.66)         | 3.3x10 <sup>-3</sup> | 1.78 (1.20-2.64)             | 4.0x10 <sup>-3</sup> | 1.46 (0.94-2.26)             | 0.095                | 1.85 (1.24-2.74)             | 2.4x10 <sup>-3</sup> |
| rs3130785 <sup>c</sup> | 30904717 | A            | add               | 1.45 (1.16-1.82)         | 1.3x10 <sup>-3</sup> | 1.46 (1.16-1.83)             | 1.2x10 <sup>-3</sup> | NA                           | NA                   | 1.46 (1.16-1.83)             | 1.2x10 <sup>-3</sup> |
| rs1632856              | 31079715 | A            | add               | 0.80 (0.68-0.95)         | 9.9x10 <sup>-3</sup> | 0.79 (0.67-0.94)             | 7.9x10 <sup>-3</sup> | 0.83 (0.70-0.99)             | 0.038                | 0.78 (0.66-0.93)             | 4.7x10 <sup>-3</sup> |
| rs2156875              | 31425326 | A            | rec               | 0.70 (0.54-0.91)         | 7.6x10 <sup>-3</sup> | 0.69 (0.53-0.90)             | 5.8x10 <sup>-3</sup> | 0.75 (0.57-0.97)             | 0.031                | 0.67 (0.52-0.88)             | 3.6x10 <sup>-3</sup> |
| rs2848716              | 31495946 | G            | rec               | 0.37 (0.18-0.76)         | 6.2x10 <sup>-3</sup> | 0.37 (0.18-0.75)             | 5.7x10 <sup>-3</sup> | 0.40 (0.20-0.81)             | 0.011                | 0.37 (0.18-0.76)             | 6.2x10 <sup>-3</sup> |
| rs2524279              | 31500885 | G            | add               | 0.73 (0.58-0.92)         | 8.0x10 <sup>-3</sup> | 0.73 (0.58-0.92)             | 7.4x10 <sup>-3</sup> | 0.74 (0.58-0.93)             | 0.010                | 0.73 (0.58-0.92)             | 8.3x10 <sup>-3</sup> |
| <b>Region C</b>        |          |              |                   |                          |                      |                              |                      |                              |                      |                              |                      |
| rs9296068 <sup>c</sup> | 33096673 | C            | add               | 1.37 (1.17-1.61)         | 1.2x10 <sup>-4</sup> | 1.38 (1.17-1.62)             | 1.0x10 <sup>-4</sup> | 1.38 (1.17-1.62)             | 1.2x10 <sup>-4</sup> | NA                           | NA                   |
| rs406477               | 33113622 | G            | rec               | 2.03 (1.21-3.42)         | 7.7x10 <sup>-3</sup> | 2.10 (1.24-3.54)             | 5.7x10 <sup>-3</sup> | 1.92 (1.14-3.24)             | 0.015                | 1.70 (1.00-2.87)             | 0.052                |
| rs213220               | 33310618 | G            | dom               | 0.69 (0.54-0.88)         | 2.4x10 <sup>-3</sup> | 0.69 (0.54-0.87)             | 2.1x10 <sup>-3</sup> | 0.69 (0.54-0.88)             | 2.6x10 <sup>-3</sup> | 0.76 (0.60-0.98)             | 0.032                |
| rs213226               | 33317288 | G            | rec               | 1.39 (1.09-1.78)         | 8.4x10 <sup>-3</sup> | 1.40 (1.09-1.79)             | 8.3x10 <sup>-3</sup> | 1.39 (1.08-1.78)             | 9.4x10 <sup>-3</sup> | 1.27 (0.99-1.64)             | 0.064                |
| rs213203 <sup>d</sup>  | 33346382 | A            | het               | 0.68 (0.55-0.84)         | 3.6x10 <sup>-4</sup> | 0.69 (0.56-0.85)             | 6.0x10 <sup>-4</sup> | 0.68 (0.55-0.84)             | 4.0x10 <sup>-4</sup> | 0.68 (0.55-0.84)             | 4.0x10 <sup>-4</sup> |
| rs210179               | 33593214 | A            | rec               | 1.43 (1.11-1.85)         | 6.3x10 <sup>-3</sup> | 1.45 (1.12-1.87)             | 4.7x10 <sup>-3</sup> | 1.42 (1.10-1.83)             | 7.8x10 <sup>-3</sup> | 1.35 (1.04-1.75)             | 0.022                |
| rs9469473              | 33610865 | G            | add               | 1.42 (1.13-1.78)         | 2.9x10 <sup>-3</sup> | 1.41 (1.12-1.78)             | 3.0x10 <sup>-3</sup> | 1.44 (1.15-1.82)             | 1.7x10 <sup>-3</sup> | 1.31 (1.04-1.65)             | 0.023                |

Abbreviations: CI, confidence interval; NA, not applicable; OR, odds ratio; SNP, single nucleotide polymorphism; xMHC, extended major histocompatibility complex

<sup>a</sup>The genetic model of inheritance assumed in the logistic regression model and corresponding to the presented results. Abbreviations: add, log-additive; dom, dominant; rec, recessive; het, heterozygotes versus homozygotes

<sup>b</sup>ORs and 95% CI for each SNP were derived using logistic regression assuming the indicated genetic model of inheritance and adjusting for child's age, sex, race/ethnicity (non-Hispanic white versus Hispanic), and additionally for either rs7747023, rs3130785, or rs9296068 as specified in the table.

<sup>c</sup>The 20 SNPs showing a p-value of less than 0.01 in the single SNP analysis appeared to spatially cluster within 1 of 3 regions of the xMHC. Each SNP was adjusted for rs7747023, rs3130785, and rs9296068, the SNP with strongest p-value within each region, to evaluate the independence of effects.

<sup>d</sup>Evaluation of the genetic model of inheritance indicated a significant deviation from the log-additive model with an effect associated with heterozygotes. ORs and 95% CI were estimated for heterozygous genotypes compared to homozygous genotypes.
